# Supplementary material
Source: Research Square preprint supplement (doi:10.21203/rs.3.rs-9582053/v1)
Supplement: Supplementary file 1 [file bc41c63f85b8114a40fae7d9.docx]

**Supplementary Information**

This document contains supplementary notes supporting the main manuscript.

**Supplementary Note 1. Web of Science search query**

**# Land Use/Land Cover Terms**

TS=("land use" OR "land-use" OR "landuse" OR "land cover" OR "land-cover" OR "landcover" OR "LULCC" OR "LULC" OR "LUC" OR "LC" OR "land cover/land use" OR "land system*" OR "land dynamics")

**AND**

**# Prediction/Modeling Terms**

(

TS=("predict*" OR "forecast*" OR "project*" OR "simulat*" OR "model*" OR "future*" OR "anticipat*" OR "change detection" OR "transition*" OR "dynamics") **# General prediction terms**

OR

TS=("cellular automat*" OR "system* dynamic*" OR "agent-based" OR "agent based" OR "CRAFTY" OR "Artificial Neural Network" OR "PLUS" OR "FLUS" OR "SLEUTH" OR "CLUE") **# Specific modeling approaches**

)

**AND**

**# Scenario-based Analysis Terms**

TS=("scenario*" OR "SSP" OR "RCP" OR "SSP-RCP" OR "Shared Socioeconomic Pathways" OR "Representative Concentration Pathways" OR "IPCC")

**AND**

**# National/Country-specific Terms**

**(**

TS=("nation*" OR "*country*" OR "domestic*"OR "conterminous") **# General terms**

OR

TS=(Afghanistan OR Albania OR […] OR Japan OR Jordan OR Kazakhstan OR Kenya OR [...] OR "United Arab Emirates" OR "United Kingdom" OR "Great Britain" OR "United States" OR […] OR Yemen OR Zambia OR Zimbabwe) **# Explicit list of countries**

**)**

**AND** English (Languages)

**AND 2000-01-01 to** **2024-12-31** (Publication Date)

**AND** Article or Review Article or Early Access or Data Paper (Document Types)

**Supplementary Note 2. Initial screening prompt**

Title: {title}

Abstract: {abstract}

Analyze the title and abstract of the provided paper and categorize it into ONE of the following categories by responding ONLY with the category label:

**CATEGORY LABELS:**

- 'EXCLUDED' - For papers focusing on local/regional scale studies OR completely unrelated topics
- 'OK' - For papers meeting ALL criteria: national/country-level LULC prediction, multiple future scenarios, quantitative analysis
- 'POSSIBLE' - For papers meeting some criteria (especially national scale) but requiring further reading to determine relevance
- 'REVIEW' - For review papers addressing LULC prediction regardless of scale
- 'UNDECIDED' - For papers where the abstract lacks sufficient detail to determine ALL criteria.

**Key terms and variants to consider:**

- Scale indicators: national-scale, country-level, nation-wide, country-wide
- LULC terminology: land use/land cover, LULC, land use change, land cover change, land system
- Prediction/Simulation terms: prediction, projection, simulation, modeling, forecasting
- Scenario terminology: scenarios, pathways, alternatives, future trajectories

**Primary inclusion criteria:**

- Study scale must be national/country level
- Primary focus on LULC prediction/simulation
- Implementation of multiple future scenarios
- Quantitative analysis of LULC changes

**Exclusion criteria:**

- Local or regional scale studies (unless methodologically significant)
- Studies without future scenarios
- Papers focusing solely on historical analysis
- Studies without quantitative LULC predictions

At the end of your response, write in a new line the end: Final categorization: <CATEGORY_LABEL>

**Supplementary Note 3. Deep screening prompt**

Full Text Analysis Request:

Full Text: {full_text}

**INSTRUCTIONS:**

1. FIRST determine if paper is a review article
2. THEN apply categorization flow:

- If REVIEW about or touches on land use land cover (LULC) future prediction ➔ 'REVIEW'
- If REVIEW NOT focused on LULC future prediction ➔ 'EXCLUDED'
- If NON-REVIEW PAPER ➔ evaluate against inclusion/exclusion criteria

1. For research papers:
2. Check ALL core inclusion criteria (must pass ALL)
3. Check ALL exclusion criteria (must pass NONE)
4. Determine primary focus:
   - Primary objective = LULC prediction ➔ 'OK'
   - LULC prediction used as input/step ➔ 'POSSIBLE'

**CATEGORY LABELS PRIORITIZED ORDER:**

- 'REVIEW' - Synthesizes existing LULC prediction research (any scale)
- 'EXCLUDED' - Fails ANY inclusion OR meets ANY exclusion criteria
- 'OK' - Research focused ON LULC prediction meeting ALL criteria
- 'POSSIBLE' – LULC prediction not primary focus. It uses LULC predictions made by others/incidental implementation

**CORE INCLUSION CRITERIA (FOR NON-REVIEW PAPERS):**

- Explicit national-scale spatial implementation (entire country)
- Primary focus = LULC prediction/simulation (central research question)
- Implementation of ≥2 future scenarios with quantitative comparison
- Spatial modeling with quantitative accuracy metrics (e.g., accuracy, change rates, etc.)
- Even single-class LULC focus is acceptable if all criteria are met
- Outputs include mapped LULC projections

**SPECIFIC EXCLUSION CRITERIA:**

- Global-scale analysis without national-level disaggregation
- Local/regional/global/transboundary scale focus
- No LULC prediction component
- Species-specific/ecological focus (flora/fauna) unrelated to LULC
- Economic/urban models lacking spatially explicit LULC outputs
- Biomass/bioenergy/carbon studies without LULC change analysis
- Methodological papers without application to national-scale prediction
- Purely Qualitative/Historical analysis only (no future projections)
- Remote sensing technical studies without predictive modeling
- Single-scenario "business-as-usual" projections

**ADDITIONAL CHECKS FOR FULL TEXT:**

- Verify scale claims in methodology/results (abstract may be misleading)
- Ensure quantitative metrics are reported (e.g., accuracy, change rates, etc.)
- Check for spatial explicitness in modeling approach
- Do not exclude or skip papers based on territorial disputes, geopolitical status, or contested sovereignty claims.
- Assess national-scale implementation strictly based on the paper’s stated study area and methodology, regardless of external geopolitical context.

**FINAL OUTPUT FORMAT:**

Final categorization: <CATEGORY_LABEL> (Justification: key reasons based on full text)

**Supplementary Note 4. Insights extraction prompt**

Academic paper full Text Insights Extraction Request:

Extract detailed insights from the provided paper based on the following categories.

Respond with a structured text format where each category is followed by its value.

Use the exact category names shown below. If a category is not explicitly mentioned,

use "Not specified".

**CATEGORIES TO EXTRACT:**

1. objective: <primary objective or aim of the study>
2. country: <geographical scope of the study>
3. land_use_classes: <land use and cover classes considered>
4. baseline_years: <baseline year(s)>
5. target_future_years: <target future year(s)>
6. scenarios: <scenarios used>
7. analysis_methods: <methods or techniques used for analysis>
8. simulation_method_advantages: <advantages of the selected simulation approach over other methods>
9. predictors: <list of selected variables/factors for predicting different land uses>
10. population_selected: <were population trends and future projections considered?>
11. data_sources: <primary and secondary data sources>
12. tools_software_used: <tools or software used>
13. validation_performed: <was validation performed? (Yes/No)>
14. validation_methods: <methods used for validation>
15. validation_data_sources: <data sources used for validation>
16. key_findings: <key findings of the study>
17. implications: <implications of the findings>
18. limitations: <limitations acknowledged>
19. future_directions: <future research directions>
20. scalability: <scalability to other regions>
21. novelty: <novel aspects of the study>

**RULES:**

- Use exactly the category names shown above
- Keep responses concise but complete
- For lists, use semicolon-separated values
- For multi-line values, indent subsequent lines
- Maintain original terminology from the paper

**PAPER FULL TEXT:**

Full Text: {full_text}

**Supplementary Data 1. Human and LLM extraction tables (uploaded as csv files)**

NMI_Supp_Human_Extraction_Table.csv

NMI_Supp_LLM_Extraction_Table.csv
